# Supplementary material for: Fabrication of Nitrogen-Doped Carbon@Magnesium Silicate Composite by One-Step Hydrothermal Method and Its High-Efficiency Adsorption of As(V) and Tetracycline
Source: MDPI journal article supplement (doi:10.3390/ma16155338), 2023-07-29
Supplement: s1 [file s1]

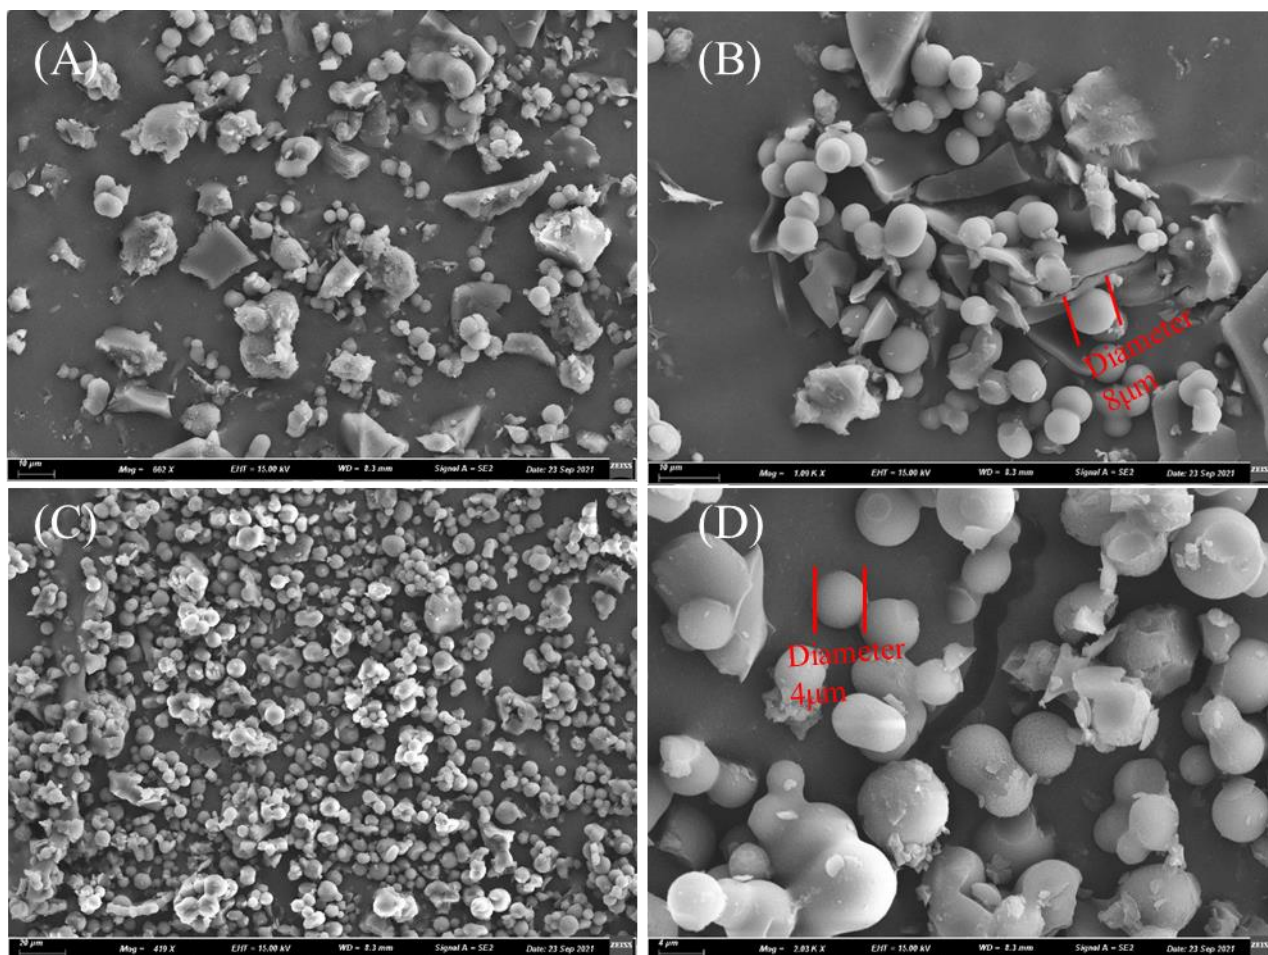

**Fig. S1** SEM images of fabricated pure carbon for (A, B) without and (C, D) with ethanol added

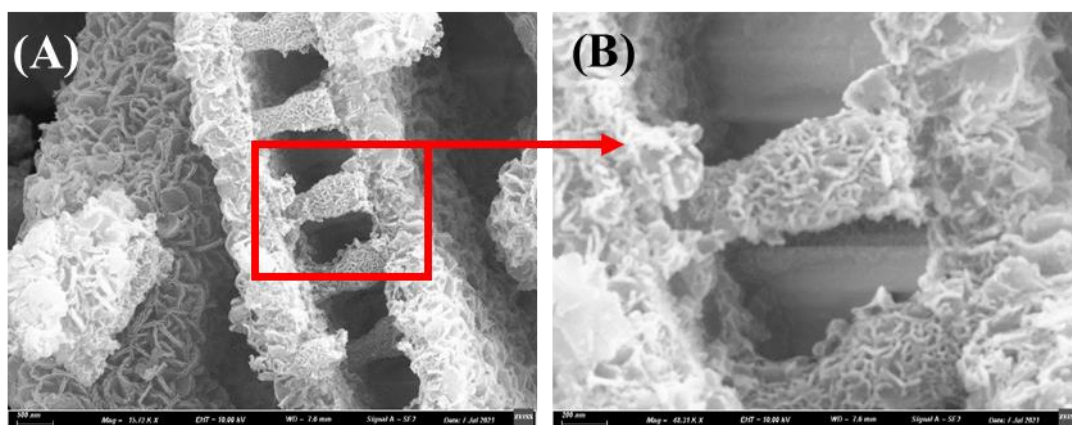

**Fig. S2** SEM images of CMS internal structure: cavity structure (A) and nanocolumn array (B)

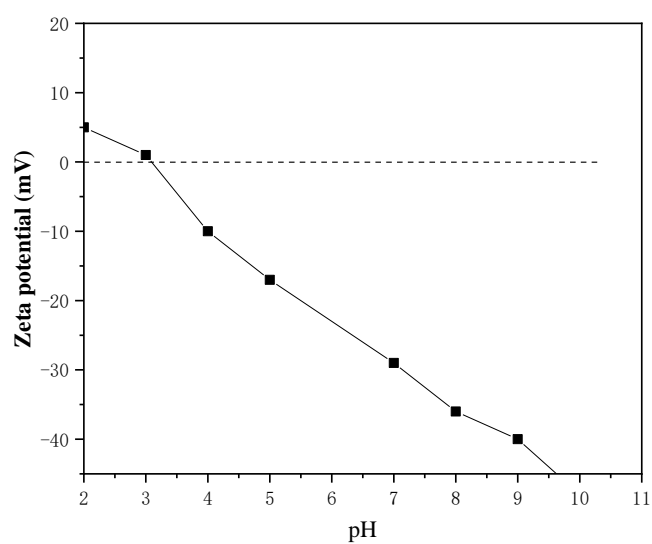

**Fig. S3** Zeta potential of CMS at different pH

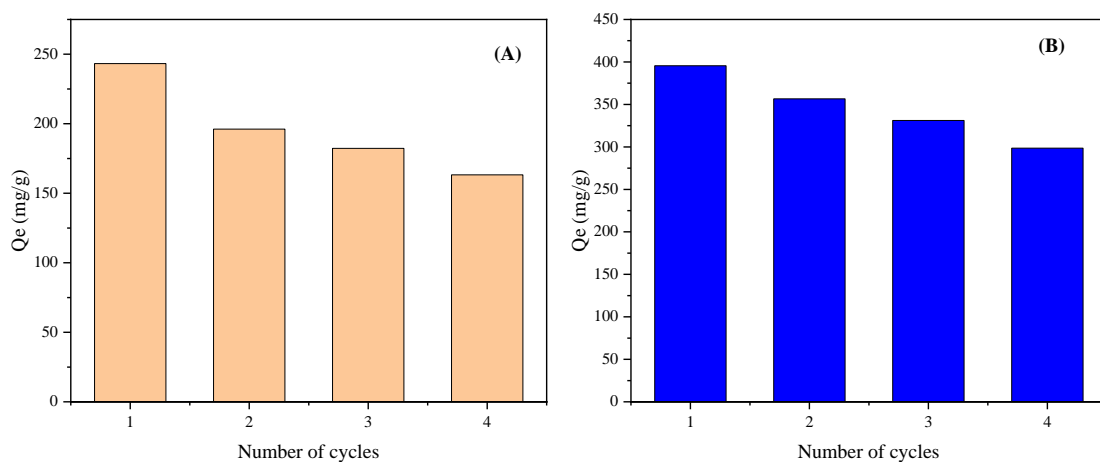

**Fig. S4** The number of recycles of CMS for the As(V) (A) and TC (B) adsorption ( $C_0=200\text{mg/L}$ ,  $m=0.02\text{g}$ ,  $V=70\text{mL}$ )

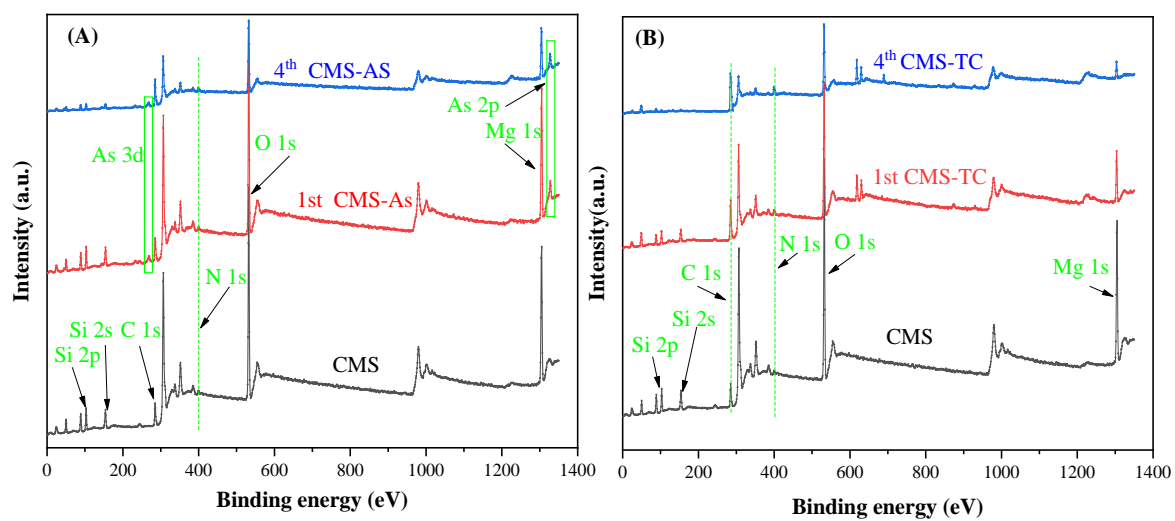

**Fig. S5** XPS survey of CMS before and after the 1<sup>st</sup> and 4<sup>th</sup> As(V)(A), TC(B) adsorption.

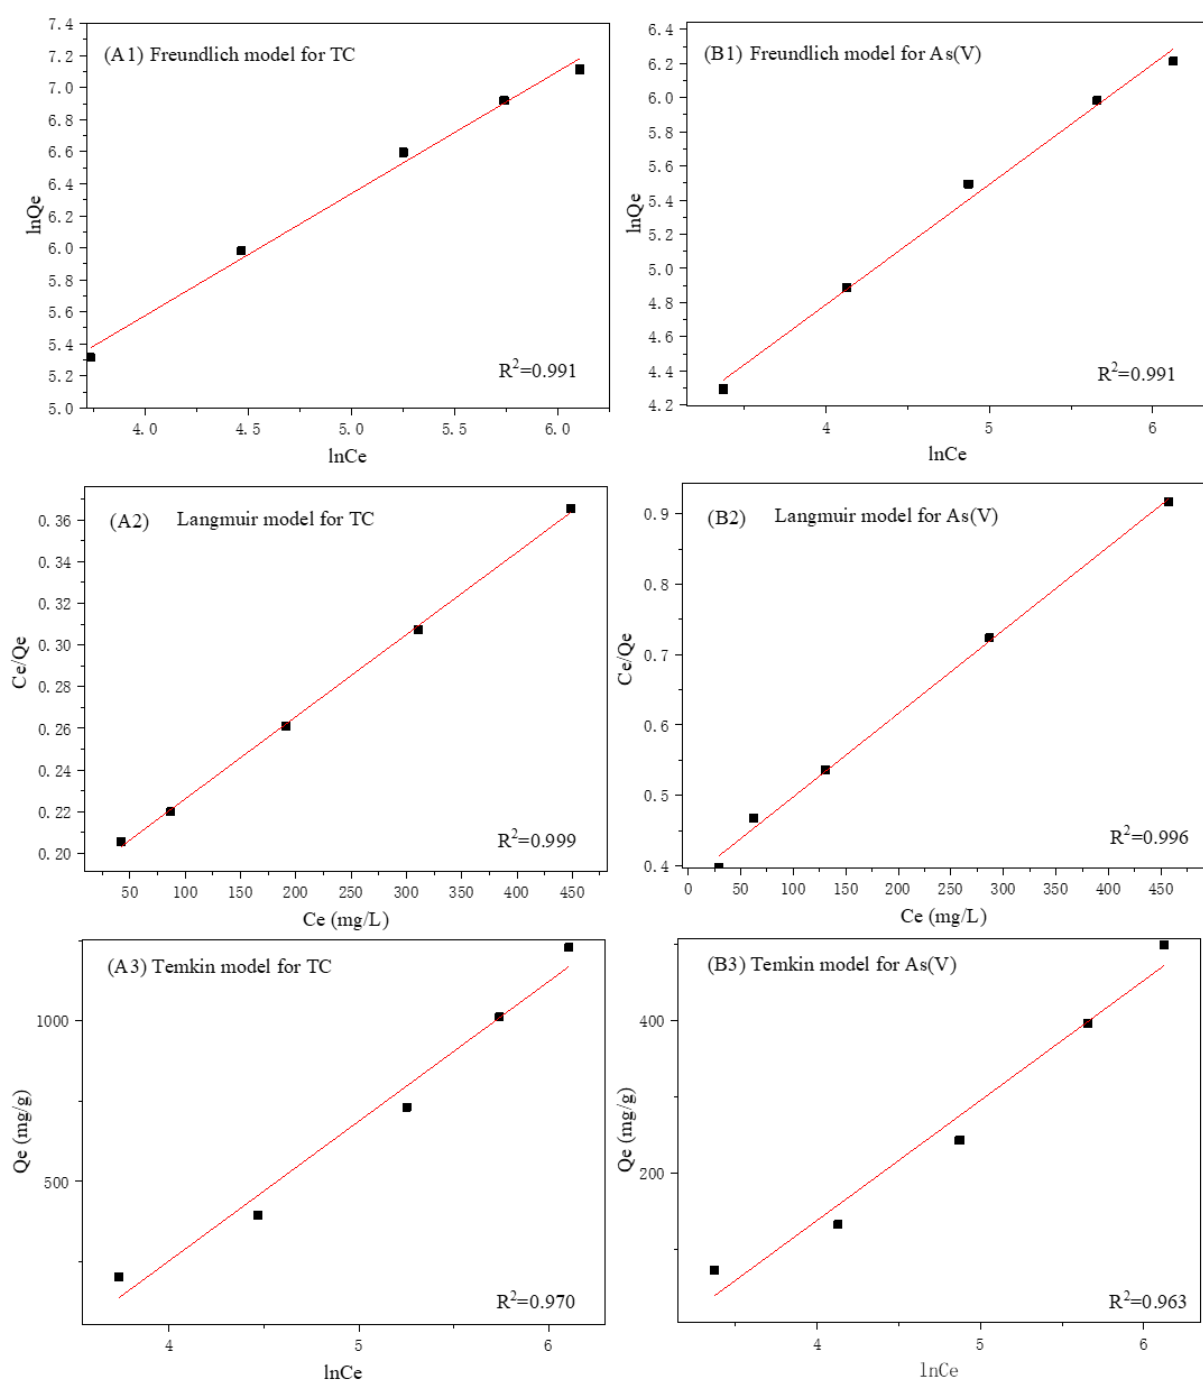

**Fig. S6** Adsorption isotherms of TC and As(V) on CMS at 298K, (A1, B1) Freundlich model, (A2, B2) Langmuir model, (A3, B3) Temkin model

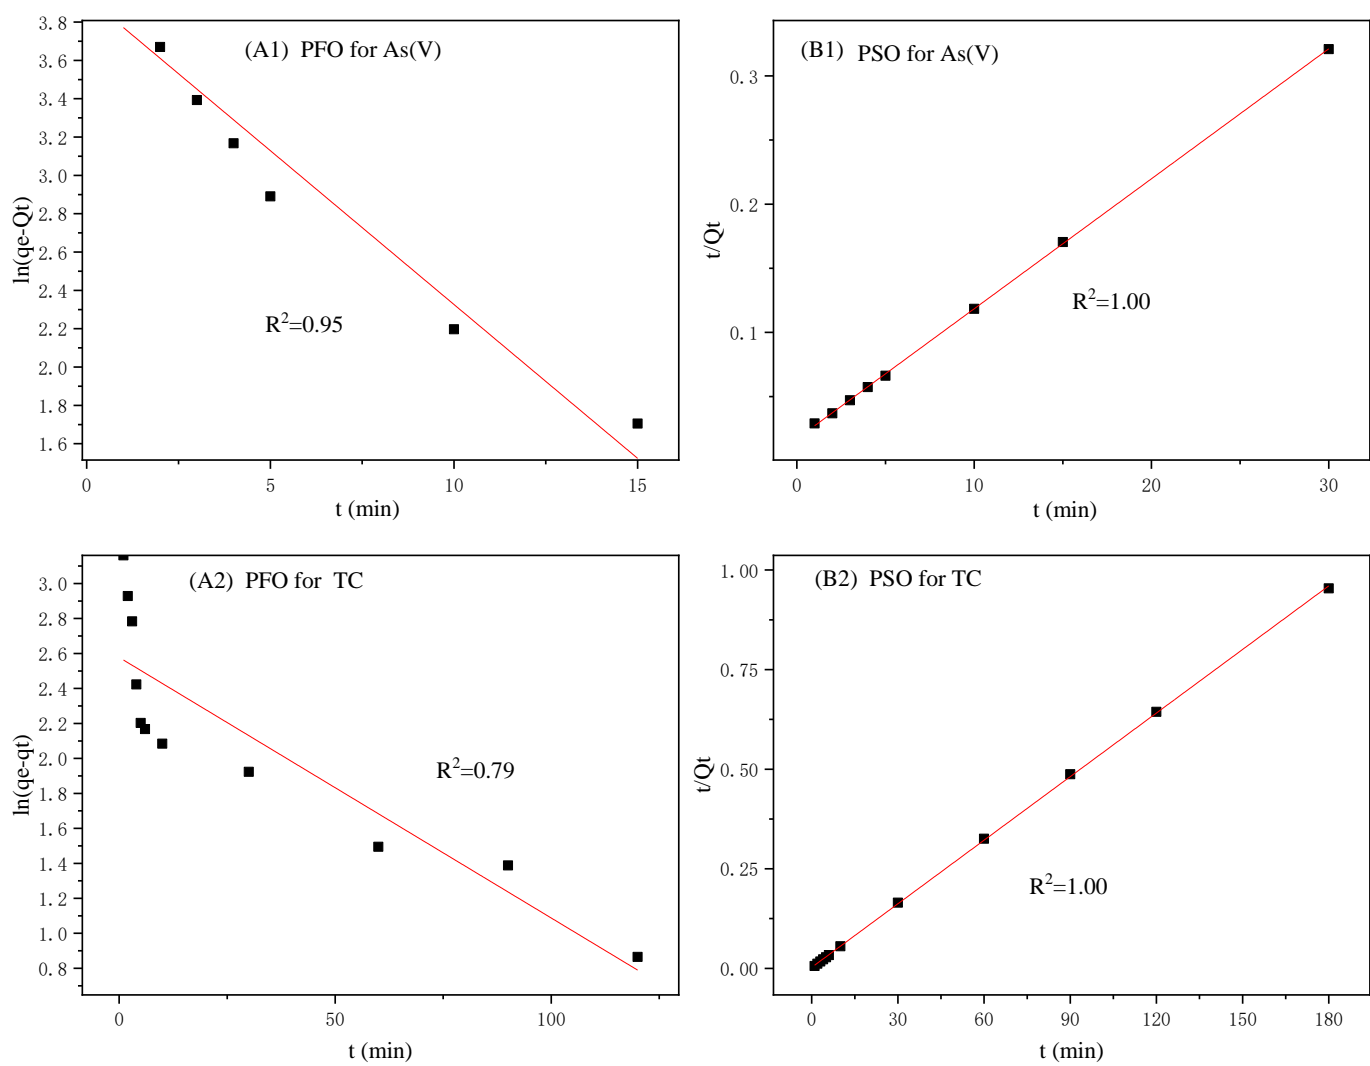

**Fig. S7** Kinetics linearly fitting of (A1, A2) PFO and (B1, B2) PSO for As(V) and TC, respectively

**Table S1.** Concentration of Mg, C and N in different samples.

| Species | Concentration (%) |                           |                           |                        |                        |
|---------|-------------------|---------------------------|---------------------------|------------------------|------------------------|
|         | CMS               | 1 <sup>st</sup> CMS-As(V) | 4 <sup>th</sup> CMS-As(V) | 1 <sup>st</sup> CMS-TC | 4 <sup>th</sup> CMS-TC |
| Mg      | 18.83             | 13.89                     | 13.81                     | 8.32                   | 3.22                   |
| C       | 15.35             | 13.23                     | 11.25                     | 35.45                  | 61.32                  |
| N       | 10.78             | 4.34                      | 1.63                      | 5.57                   | 3.16                   |
| As      | /                 | 2.63                      | 2.64                      | /                      | /                      |

## Texts

### Text S1 Isotherms model for the adsorption

The Langmuir equation could be expressed as equation (S1)

$$\frac{C_e}{q_e} = \frac{1}{q_m \times k_L} + \frac{C_e}{q_m} \quad (S1)$$

The Freundlich isotherm could be given as equation (S2)

$$\ln q_e = \ln k_F + \frac{1}{n} \ln C_e \quad (S2)$$

The Temkin isotherm could be given as equation (S3)

$$q_e = \frac{RT}{b} \ln k_T + \frac{RT}{b} \ln C_e \quad (S3)$$

where  $q_m$  (mg/g) is the theoretical maximal adsorption capacity,  $k_L$  (L/mg) is equilibrium adsorption free energy function,  $k_F$  [(mg/g)(mg/L)<sup>1/n</sup>] and  $n$  represent adsorption ability and adsorption intensity constant.  $b$ (=  $-\Delta H$ , kJ/mol) represents adsorption heat,  $k_T$  (L/mg) is Temkin model constant,  $R$  (8.314kJ/mol) is the universal gas constant and  $T$  (298K) is absolute temperature.

### Text S2 Kinetics model for the adsorption

The pseudo-first-order kinetic model is described as equation (S4):

$$\ln(q_e - q_t) = \ln q_e - k_1 t \quad (S4)$$

The pseudo-second-order kinetic model is described as equation (S5):

$$\frac{t}{q_t} = \frac{1}{k_2 q_e^2} + \frac{t}{q_e} \quad (S5)$$

where  $k_1$  and  $k_2$  represent the pseudo-first- and pseudo-second-order rate constants,  $q_e$  and  $q_t$  (mg g<sup>-1</sup>) denote the adsorption of As(V) and TC at equilibrium and time  $t$  (min)

### **Text S3 Intra-particle diffusion and Boyd model for the adsorption**

The intra-particle diffusion kinetic model is described as equation (S6):

$$Q_t = k_i t^{1/2} + C \quad (S6)$$

where  $k_i$  is a constant related to intra-particle diffusion rate and  $C$  is a constant.

The Boyd kinetic model is described as equation (S7):

$$B_t = -\ln(1 - q_t/q_e) - 0.4977 \quad (S7)$$

where  $q_t$  and  $q_e$  (mg/g) are the amounts of As(V), TC adsorbed on the adsorbent at time  $t$  and equilibrium time, respectively.
